# Supplementary material
Source: PubMed Central journal article supplement (PMC3219839)
Supplement: NIHMS324815-supplement-01.pdf [file NIHMS324815-supplement-01.pdf]

**Supplemental Figure 1. 10T1/2, HEK293, and TC/siVEGF7-1 cells express the SDF-1 $\alpha$  receptor CXCR4.** Western blot analysis for CXCR4 (43 kD) in 10T1/2, HEK293, and TC/siVEGF7-1.  $\beta$ -Actin was used as an internal loading control.

**Supplemental Figure 2. The ERK1/2(p44/42)/ELK-1 pathway is activated in response to SDF-1 $\alpha$  stimulation.** TC/siVEGF7-1 cells were plated, cultured in the absence of growth factors and supplements for 24 hours, and then treated with 100 ng/mL of SDF-1 $\alpha$  for 15, 30, or 60 minutes. Western blot analysis for activation and phosphorylation of (A) ERK1/2 (p44/42) and (B) ELK-1 (47 kD). Densitometry was performed on the bands. Total ERK1/2(p44/42) and total ELK-1, and phospho- ERK1/2(p44/42) and phospho-ELK-1 were normalized to  $\beta$ -Actin, internal control. The numbers below the panels represent the fold increase in phospho-ERK1/2(p44/42) and phospho-ELK-1 calculated as the ratio of normalized phosphorylated to total protein.
